# Supplementary material for: Availability, prices and affordability of essential medicines in Haiti
Source: PubMed Central journal article supplement (PMC3868824; doi:10.7189/jogh.03.020405), 2013-12
Supplement: jogh-03-020405-s001.pdf [file jogh-03-020405-s001.pdf]

## Online Supplementary Document

Chalal et al. Availability, prices and affordability of essential medicines in Haiti  
Journal of Global Health 2013;2:020405

**Table w1.** List of surveyed medicines in Haiti, 2011

| List               | No. | Disease                    | Name                        | Strength                 | Dosage form        |
|--------------------|-----|----------------------------|-----------------------------|--------------------------|--------------------|
| Global core list   | 1   | Asthma                     | Salbutamol                  | 100 mcg/dose             | inhaler            |
|                    | 2   | Diabetes                   | Glibenclamide               | 5 mg                     | cap/tab            |
|                    | 3   | Cardiovascular disease     | Atenolol                    | 50 mg                    | cap/tab            |
|                    | 4   | Cardiovascular disease     | Captopril                   | 25 mg                    | cap/tab            |
|                    | 5   | Cardiovascular disease     | Simvastatin                 | 20 mg                    | cap/tab            |
|                    | 6   | Depression                 | Amitriptyline               | 25 mg                    | cap/tab            |
|                    | 7   | Infectious disease         | Ciprofloxacin               | 500 mg                   | cap/tab            |
|                    | 8   | Infectious disease         | Co-trimoxazole              | 8+40 mg/ml               | suspension         |
|                    | 9   | Infectious disease         | Amoxicillin                 | 500 mg                   | cap/tab            |
|                    | 10  | Infectious disease         | Ceftriaxone                 | 1 g/vial                 | injection          |
|                    | 11  | CNS                        | Diazepam                    | 5 mg                     | cap/tab            |
|                    | 12  | Pain/inflammation          | Diclofenac                  | 50 mg                    | cap/tab            |
|                    | 13  | Pain/inflammation          | Paracetamol                 | 24 mg/ml                 | syrup/susp         |
|                    | 14  | Ulcer                      | Omeprazole                  | 20 mg                    | cap/tab            |
| Regional core list | 15  | Infectious disease         | Amoxicillin suspension      | 50 mg/ml (250mg/5ml)     | Syrup/susp         |
|                    | 16  | Hypertension               | Amlodipine                  | 5mg                      | Cap/tab            |
|                    | 17  | Hypercholesterolemia       | Atorvastatin                | 10mg                     | Cap/tab            |
|                    | 18  | Infectious disease         | Azithromycin                | 500mg                    | Cap/tab            |
|                    | 19  | Asthma                     | Beclomethasone inhaler      | 250mcg/dose              | Inhaler            |
|                    | 20  | Anxiety                    | Clonazepam                  | 2 mg                     | cap/tab            |
|                    | 21  | Fungal Infection (topical) | Clotrimazole topical cream  | 1%                       | cream              |
|                    | 22  | Hypertension               | Enalapril                   | 10 mg                    | cap/tab            |
|                    | 23  | Depression                 | Fluoxetine                  | 20 mg                    | cap/tab            |
|                    | 24  | Hypertension               | Furosemide                  | 40 mg                    | cap/tab            |
|                    | 25  | Hypertension               | Hydrochlorothiazide         | 25 mg                    | cap/tab            |
|                    | 26  | Pain/inflammation          | Ibuprofen                   | 400 mg                   | cap/tab            |
|                    | 27  | Diabetes                   | Metformin                   | 850 mg                   | cap/tab            |
|                    | 28  | Infectious disease         | Metronidazole               | 500 mg                   | cap/tab            |
|                    | 29  | Seizure Disorder           | Phenytoin                   | 100 mg                   | cap/tab            |
|                    | 30  | Ulcer                      | Ranitidine                  | 150 mg                   | cap/tab            |
| Supplementary list | 31  | Infectious disease         | Amoxicillin                 | 125mg/5ml                | Suspension         |
|                    | 32  | Infectious disease         | Amoxicillin                 | 250mg dispersible tablet | Dispersible tablet |
|                    | 33  | Infectious disease         | Amoxicillin/Clavulanic acid | 125mg+31.25mg/5ml        | Suspension         |
|                    | 34  | Infectious disease         | Amoxicillin/Clavulanic acid | 250mg + 125mg            | Dispersible tablet |
|                    | 35  | Malaria                    | Chloroquine                 | 150mg                    | Cap/tab            |
|                    | 36  | Asthma                     | Beclomethasone              | 100mcg/dose              | Inhaler            |
|                    | 37  | Infectious disease         | Benzyl penicillin           | 600mg = 1 million IU     | Injection          |
|                    | 38  | Seizure Disorder           | Carbamazepine               | 100mg/5ml                | Suspension         |
|                    | 39  | Seizure Disorder           | Carbamazepine               | 100mg                    | Chewable tablet    |
|                    | 40  | Infectious disease         | Ceftriaxone                 | 500mg vial               | Injection          |
|                    | 41  | Infectious disease         | Chloramphenicol             | 1 gram vial              | Injection          |

|    |                    |                                 |                                                  |                          |
|----|--------------------|---------------------------------|--------------------------------------------------|--------------------------|
| 42 | Infectious disease | Cotrimoxazole                   | 100mg + 20mg<br>(also expressed as 400mg + 80mg) | Dispersible tablet       |
| 43 | Anxiety            | Diazepam                        | 2.5mg/ml                                         | Rectal solution          |
| 44 | Anemia             | Ferrous salt                    | 30mg Fe/5ml                                      | Suspension               |
| 45 | Infectious disease | Gentamycin                      | 10mg/ml                                          | Injection                |
| 46 | Pain/inflammation  | Ibuprofen                       | 200mg                                            | Tablet                   |
| 47 | Tuberculosis       | Isoniazid                       | 50mg                                             | Scored tablet            |
| 48 | Pain               | Morphine                        | 10mg/5ml                                         | Oral solution            |
| 49 | Pain               | Morphine                        | 10 mg                                            | Immediate release tablet |
| 50 | Dehydration        | Oral rehydration solution (ORS) | To make 500ml                                    | Sachet                   |
| 51 | Dehydration        | ORS                             | To make 1 liter                                  | Sachet                   |
| 52 | Seizure Disorder   | Phenobarbital                   | 200mg/ml                                         | Injection                |
| 53 | Seizure Disorder   | Phenobarbital                   | 3mg/ml (also expressed as 15mg/5ml)              | Oral liquid              |
| 54 | Seizure Disorder   | Phenytoin                       | 25 or 30mg/5ml                                   | Suspension               |
| 55 | Seizure Disorder   | Phenytoin                       | 50mg                                             | Chewable tablet          |
| 56 | Infectious disease | Procaine penicillin             | 1 gram = 1 million IU                            | Injection                |
| 57 | Xerophthalmia      | Vitamin A                       | 100,000IU                                        | Capsules                 |
| 58 | Dehydration        | Zinc                            | 20mg                                             | Tablet (dispersible)     |
| 59 | Hypertension       | Enalaril                        | 5mg                                              | Cap/tab                  |
| 60 | Asthma (device)    | Spacer for Inhalers             | n/a                                              | n/a                      |

**Table w2.** Median price ratio for selected lowest priced generic medications, by sector

| No. | Medicine Name                                             | Lowest priced Generic Medication MPR [25 <sup>th</sup> -75 <sup>th</sup> percentile] |                    |                    |                   |
|-----|-----------------------------------------------------------|--------------------------------------------------------------------------------------|--------------------|--------------------|-------------------|
|     |                                                           | Public Sector                                                                        | Retail Sector      | Non-Profit Sector  | Mixed Sector      |
| 1   | Amitriptyline                                             | N/A                                                                                  | 13.3 [9.95-20.7]   | N/A                | N/A               |
| 2   | Amlodipine                                                | N/A                                                                                  | 4.1 [2.4 - 5.8]    | 2.9 [1.4 - 4.1]    | N/A               |
| 3   | Amoxicillin                                               | 2.6 [2.2 - 3.5]                                                                      | 4.3 [3.5 - 4.3]    | 3.5 [2.2 - 4.3]    | 3 [2.6 - 3.3]     |
| 4   | Amoxicillin suspension                                    | 2.8 [2.4 - 3.2]                                                                      | 3.2 [3.2 - 3.5]    | 2.5 [2.3 - 3]      | 2.3 [2.1 - 3.4]   |
| 5   | Amoxicillin suspension<br>125 mg/5 ml                     | 3.4 [2.8 - 4.2]                                                                      | 3.5 [3.2 - 4.6]    | 2.8 [2.8 - 3.5]    | 2.8 [2.8 - 3.8]   |
| 6   | Atenolol                                                  | 7.7 [5 - 12.2]                                                                       | 15.9 [10.6 - 26.5] | 10 [5 - 23.2]      | 13.3 [7.3 - 26.5] |
| 7   | Atorvastatin                                              | N/A                                                                                  | 11.7 [11.4 - 11.7] | N/A                | N/A               |
| 8   | Azithromycin                                              | 1.9 [1.1 - 2.3]                                                                      | 3.8 [1.9 - 5]      | 0.6 [0.3 - 1.4]    | 1 [0.2 - 2.6]     |
| 9   | Captopril                                                 | 8.4 [2.9 - 10.5]                                                                     | 10.5 [7.1 - 10.5]  | 10.5 [4.2 - 18.1]  | 6.3 [2.1 - 10.5]  |
| 10  | Ceftriaxone injection [1<br>g/vial]                       | 2.6 [1.8 - 5.5]                                                                      | 5.5 [4.4 - 5.6]    | 4.4 [2.4 - 7.3]    | 3.7 [1.8 - 3.7]   |
| 11  | Chloramphenicol<br>Injection [1 g/vial]                   | N/A                                                                                  | 3.1 [2.4 - 3.7]    | N/A                | N/A               |
| 12  | Chloroquine                                               | 2.7 [2.7 - 5.3]                                                                      | 5.3 [5.3 - 7.3]    | 5.3 [2.7 - 5.6]    | 4 [2.7 - 6.6]     |
| 13  | Ciprofloxacin                                             | 4.1 [2.5 - 4.5]                                                                      | 5.1 [4.2 - 8.2]    | 4.1 [3.5 - 4.1]    | 4.1 [1.7 - 4.1]   |
| 14  | Clotrimazole topical<br>cream                             | 5.9 [4.9 - 8.6]                                                                      | 7.8 [6.7 - 9.3]    | N/A                | N/A               |
| 15  | Co-trimoxazole<br>suspension                              | 3.6 [3 - 4.5]                                                                        | 4.5 [3.6 - 4.7]    | 3.6 [3 - 4.2]      | 3.3 [3 - 3.6]     |
| 16  | Diazepam                                                  | 20.7 [8.3 - 20.7]                                                                    | 20.7 [20.7 - 41.3] | 16.5 [10.8 - 20.7] | 8.3 [4.1 - 9.3]   |
| 17  | Diclofenac                                                | 11.7 [8.1 - 16.1]                                                                    | 25.2 [14.7 - 29.3] | 11.7 [10.3 - 26.4] | 8.8 [5.9 - 13.9]  |
| 18  | Enalapril                                                 | 3.8 [2.6 - 5.7]                                                                      | 6.7 [5.9 - 8.4]    | 5.0 [2.7 - 6.7]    | 3.4 [3.4 - 5.9]   |
| 19  | Enalapril [5 mg]                                          | 9.3 [7 - 11.6]                                                                       | 8.7 [7.4 - 12.4]   | 9.9 [9.3 - 11.1]   | 6.2 [6.2 - 7.7]   |
| 20  | Fluoxetine                                                | N/A                                                                                  | 49.6 [48.7 - 82.6] | N/A                | N/A               |
| 21  | Furosemide                                                | 11.7 [5.9 - 13.9]                                                                    | 14.7 [11.7 - 17.6] | 11.7 [11.7 - 12.9] | 11.7 [7.7 - 11.7] |
| 22  | Glibenclamide                                             | 18.5 [13.6 - 4.1]                                                                    | 20.4 [14.8 - 35.2] | 11.1 [7.4 - 31.5]  | 14.8 [7.4 - 18.5] |
| 23  | Hydrochlorothiazide                                       | 7.5 [6.8 - 20.4]                                                                     | 20.4 [13.6 - 38.1] | 10.2 [6.8 - 13.6]  | 6.8 [6.8 - 8.5]   |
| 24  | Ibuprofen [200 mg]                                        | 5.3 [3.7 - 8.5]                                                                      | 8.5 [8.5 - 16]     | 4.3 [4.3 - 8.5]    | 4.3 [4.3 - 8]     |
| 25  | Ibuprofen [400 mg]                                        | 5.4 [2.7 - 5.4]                                                                      | 8 [5.7 - 9.4]      | 5.4 [3 - 7.4]      | 4 [2.7 - 5.4]     |
| 26  | Metformin                                                 | 10.2 [8.7 - 10.7]                                                                    | 11.8 [8.7 - 16.4]  | N/A                | N/A               |
| 27  | Metronidazole                                             | 10.8 [8.1 - 15.8]                                                                    | 18 [10.8 - 18]     | 16.2 [7.2 - 18]    | 7.2 [6.3 - 10.8]  |
| 28  | Omeprazole                                                | 4.2 [3.5 - 4.2]                                                                      | 4.2 [3.7 - 5.2]    | 3.8 [2.5 - 5.3]    | 2.9 [2.1 - 4.2]   |
| 29  | Oral rehydration<br>solution [1 L]                        | N/A                                                                                  | 2.4 [1.5 - 4.4]    | 1.5 [1.5 - 2.9]    | N/A               |
| 30  | Paracetamol suspension<br>[120 mg/5 ml or 125<br>mg/5 ml] | 3.9 [3.2 - 4.9]                                                                      | 4.9 [3.2 - 6.46]   | 3.2 [3.2 - 4]      | 3.9 [3.2 - 5.1]   |
| 31  | Phenytoin                                                 | N/A                                                                                  | 30.2 [15.1 - 62.2] | N/A                | N/A               |
| 32  | Ranitidine                                                | 3.8 [2.5 - 6.3]                                                                      | 5.7 [3.8 - 6.3]    | 3.8 [3.8 - 15.1]   | 3.2 [2.5 - 3.5]   |
| 33  | Salbutamol inhaler                                        | 2.1 [1.5 - 2.9]                                                                      | 2.3 [2.2 - 2.6]    | 1.7 [1.4 - 2.5]    | 2.2 [1.9 - 2.4]   |
| 34  | Simvastatin                                               | N/A                                                                                  | 6.1 [5.1 - 12.1]   | N/A                | N/A               |
